# Supplementary material for: Investigation of the local environment of iodate in hydroxyapatite by combination of X-ray absorption spectroscopy and DFT modeling
Source: Royal Society of Chemistry journal article supplement (doi:10.1039/c3ra47691j), 2014-01-01
Supplement: c3ra47691j1.pdf [file c3ra47691j1.pdf]

## Investigation of the local environment of iodate in hydroxyapatite by combination of X-ray absorption spectroscopy and DFT modeling

D. Laurencin, D. Vantelon, V. Briois, C. Gervais, A. Coulon, A. Grandjean, L. Campayo

### Supplementary Materials

Figure S1: XRD of SrI-HA

Figure S2: IR spectrum of SrI-HA.

Figure S3: I L<sub>3</sub>-edge XAS of CaI-HA, showing the proximity of the Ca K-edge.

Figure S4: I K-edge EXAFS data of Na(IO<sub>3</sub>) and SrI-HA.

Figure S5: Local environment of the iodine in Na(IO<sub>3</sub>), K(IO<sub>3</sub>) and Ca(IO<sub>3</sub>)<sub>2</sub>.H<sub>2</sub>O.

Figure S6: DFT models of iodate-substituted Ca-HA (Ca<sub>10</sub>(PO<sub>4</sub>)<sub>6</sub>(OH)<sub>1.75</sub>(IO<sub>3</sub>)<sub>0.25</sub>), after geometry optimisation.

Figure S7: Ca K-edge XANES data for non-substituted and iodate-substituted Ca-HA

Table S1: Relative energies of the four DFT models of iodate-substituted Ca-HA (Ca<sub>10</sub>(PO<sub>4</sub>)<sub>6</sub>(OH)<sub>1.75</sub>(IO<sub>3</sub>)<sub>0.25</sub>), after geometry optimisation.

Table S2: Comparison of iodine local environments in the Sr(IO<sub>3</sub>)<sub>2</sub>.H<sub>2</sub>O, Ca(IO<sub>3</sub>)<sub>2</sub> and Ca(IO<sub>3</sub>)<sub>2</sub>.H<sub>2</sub>O crystal structures, before and after DFT relaxation of atomic positions.

**Figure S1: XRD powder pattern of SrI-HA (in blue).** The black vertical lines correspond to the indexing of the non-substituted Sr-HA crystal structure.

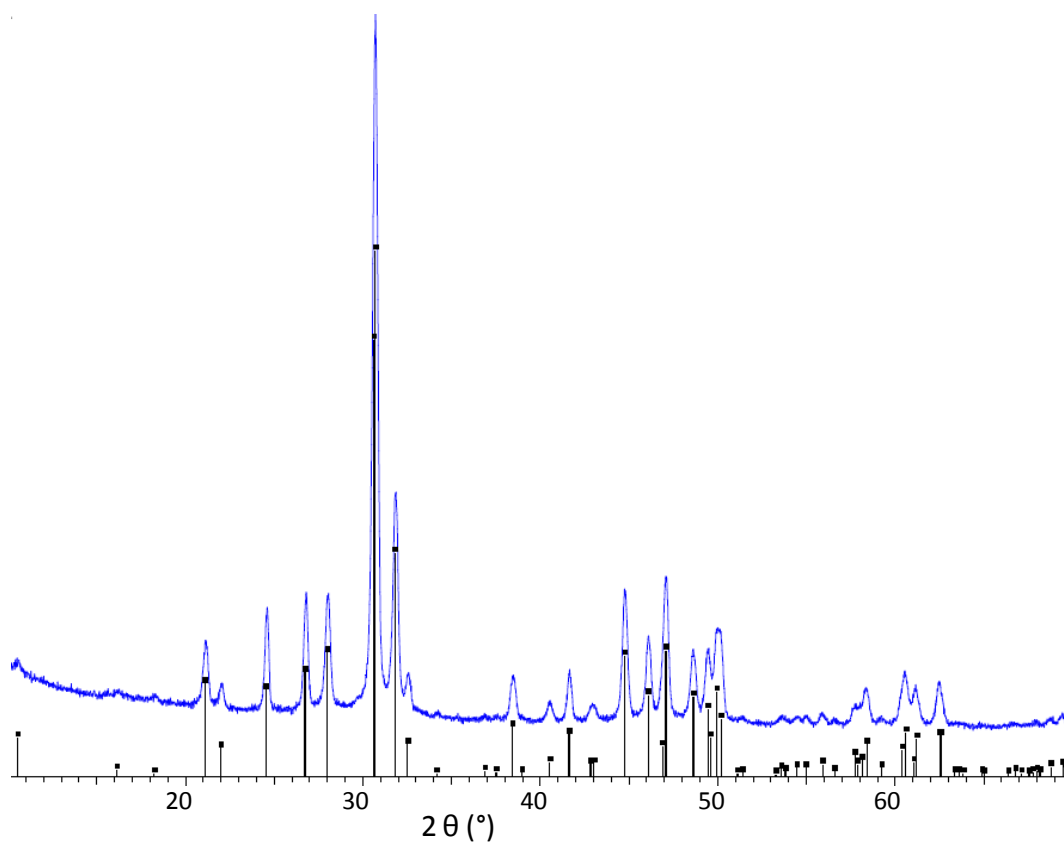

*Measurement conditions:*

The X-Ray diffraction powder pattern was acquired on a PanAnalytical diffractometer equipped with an ultra-fast X'celerator detector X'pert Pro, and using the Cu K $\alpha$  radiation ( $\lambda = 1.5405 \text{ \AA}$ ). The  $2\theta$  range between  $10^\circ$  and  $70^\circ$  was scanned, with a step size of  $0.0174$ , a time per step of  $40 \text{ s}$ . The experimental diffractogram was analysed using EVA (Bruker, version 12.0 rev 0). The Cu-K $\alpha_2$  contribution was removed.

**Figure S2: IR spectrum of SrI-HA.** The broad band centered at  $\sim 760\text{ cm}^{-1}$  is characteristic of I-O stretching vibration in iodates.

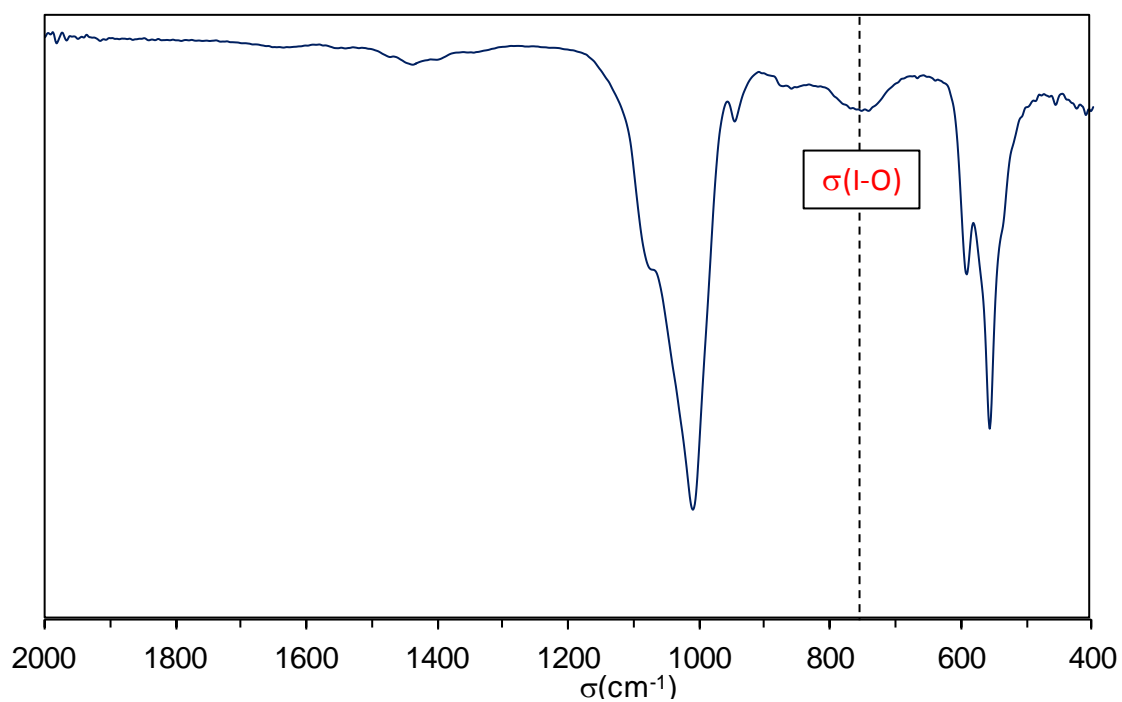

*Measurement conditions:*

The IR spectrum was recorded in transmission mode on a KBr pellet, using a Bruker Vertex 70 spectrometer.

**Figure S3: I L<sub>3</sub>-edge XAS spectrum of CaI-HA, showing the proximity with the Ca K-edge.**

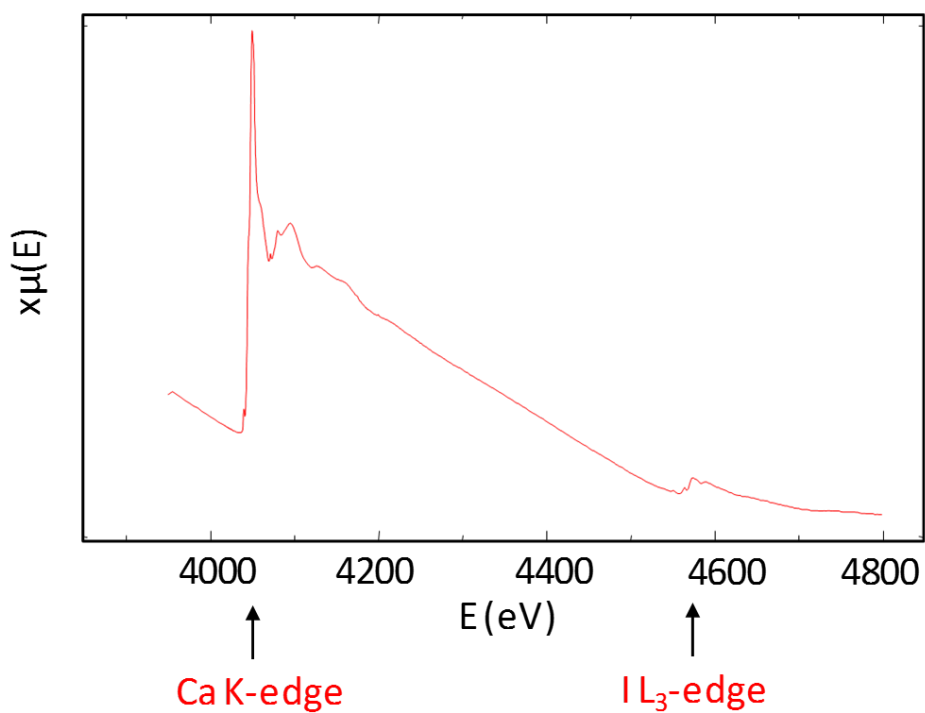

*Measurement conditions:*

The spectrum was recorded in transmission mode on the LUCIA beamline at Soleil (see experimental section for further details).

**Figure S4: I K-edge EXAFS data of Na(IO<sub>3</sub>) and SrI-HA, with a/ the EXAFS oscillations and b/ the Fourier Transform of the oscillations.**

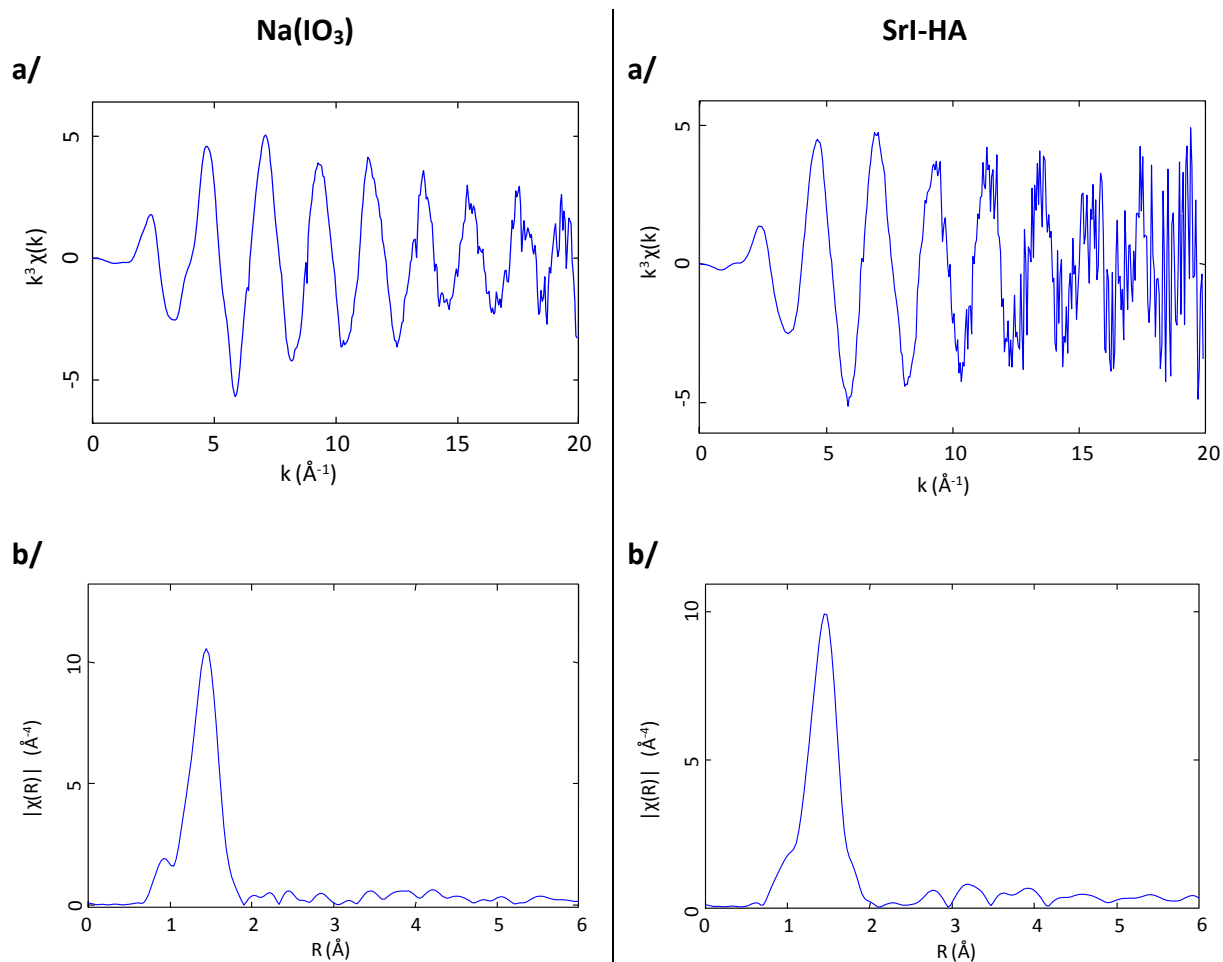

**Figure S5. Local environment of the iodine in Na(IO<sub>3</sub>), K(IO<sub>3</sub>) and Ca(IO<sub>3</sub>)<sub>2</sub>·H<sub>2</sub>O.**

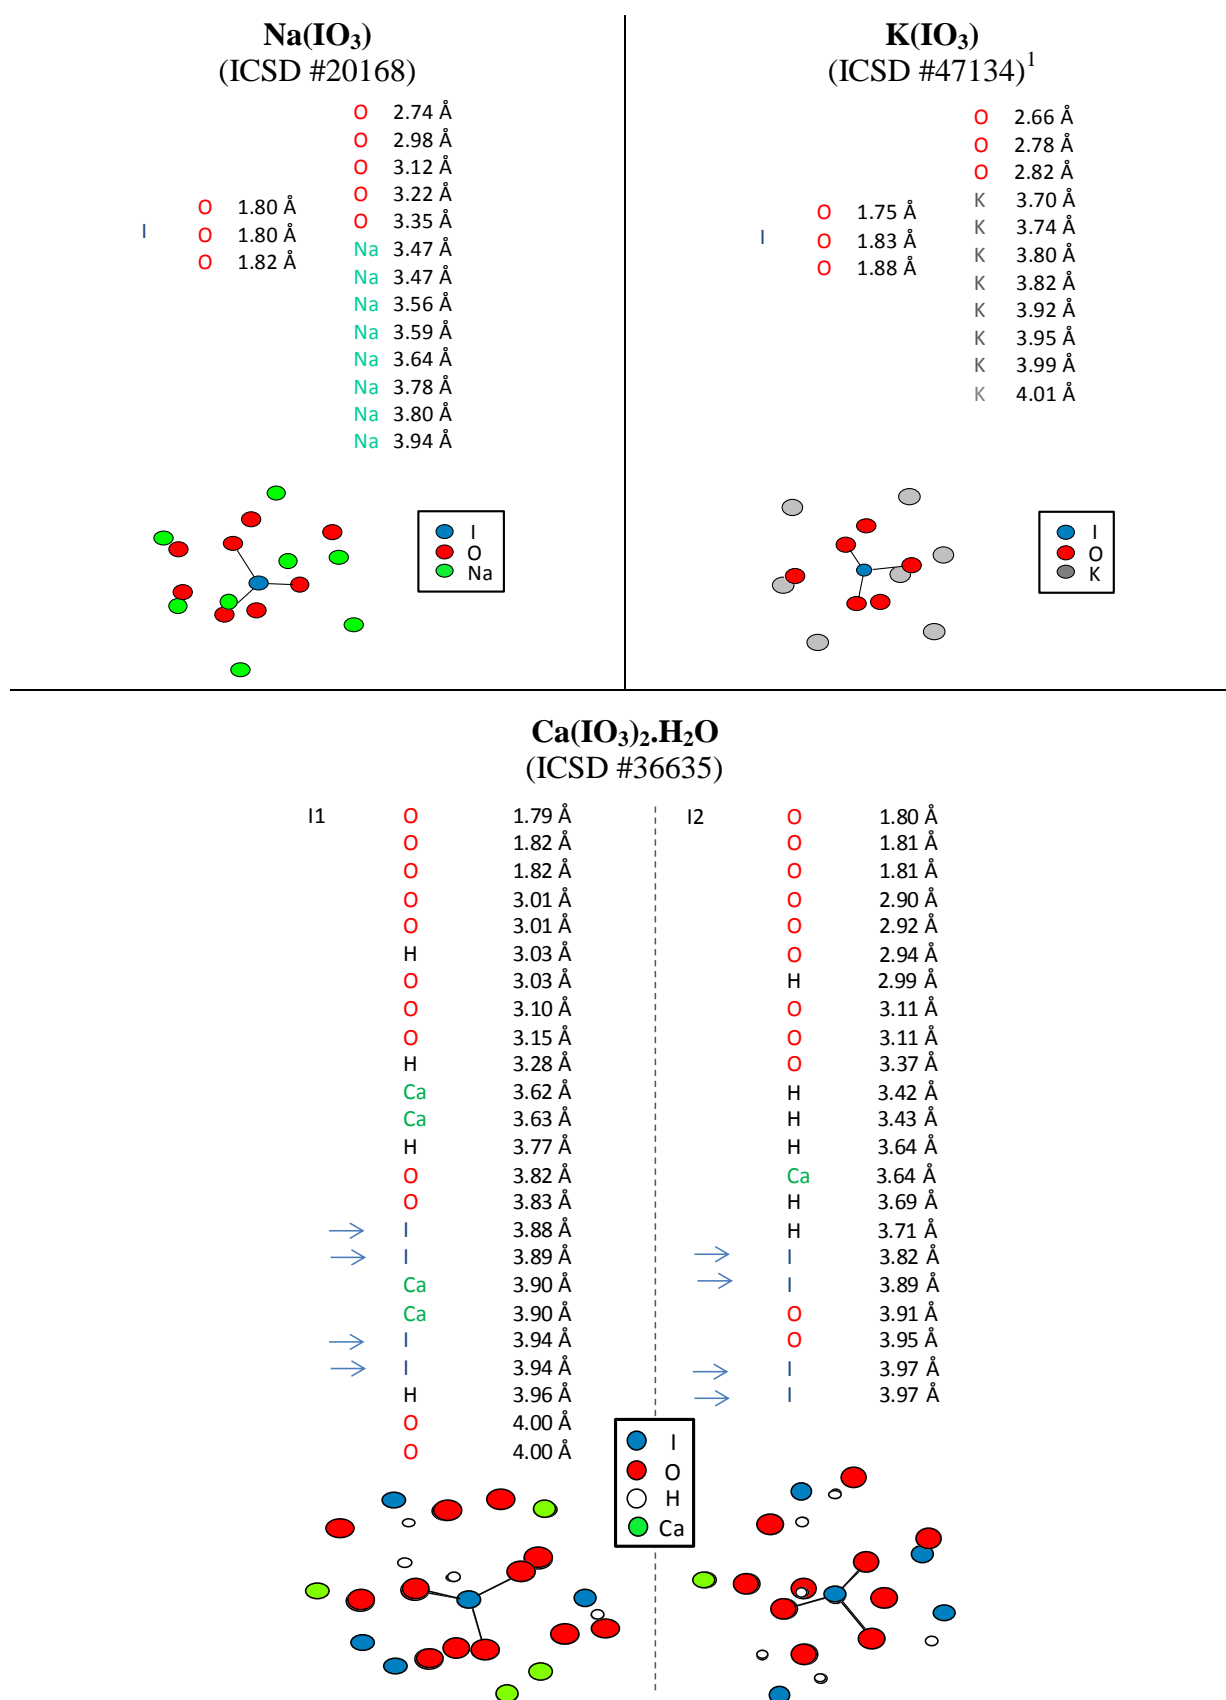

<sup>1</sup> There are 4 inequivalent iodine atoms in the crystal structure, but all have a similar local environment; only the distances around one of the I atoms are reported here.

**Figure S6. DFT models of iodate-substituted Ca-HA** ( $\text{Ca}_{10}(\text{PO}_4)_6(\text{OH})_{1.75}(\text{IO}_3)_{0.25}$ ), after geometry optimisation. Ca, P, O, H, and I atoms are in green, dark brown, red, white, and blue, respectively.

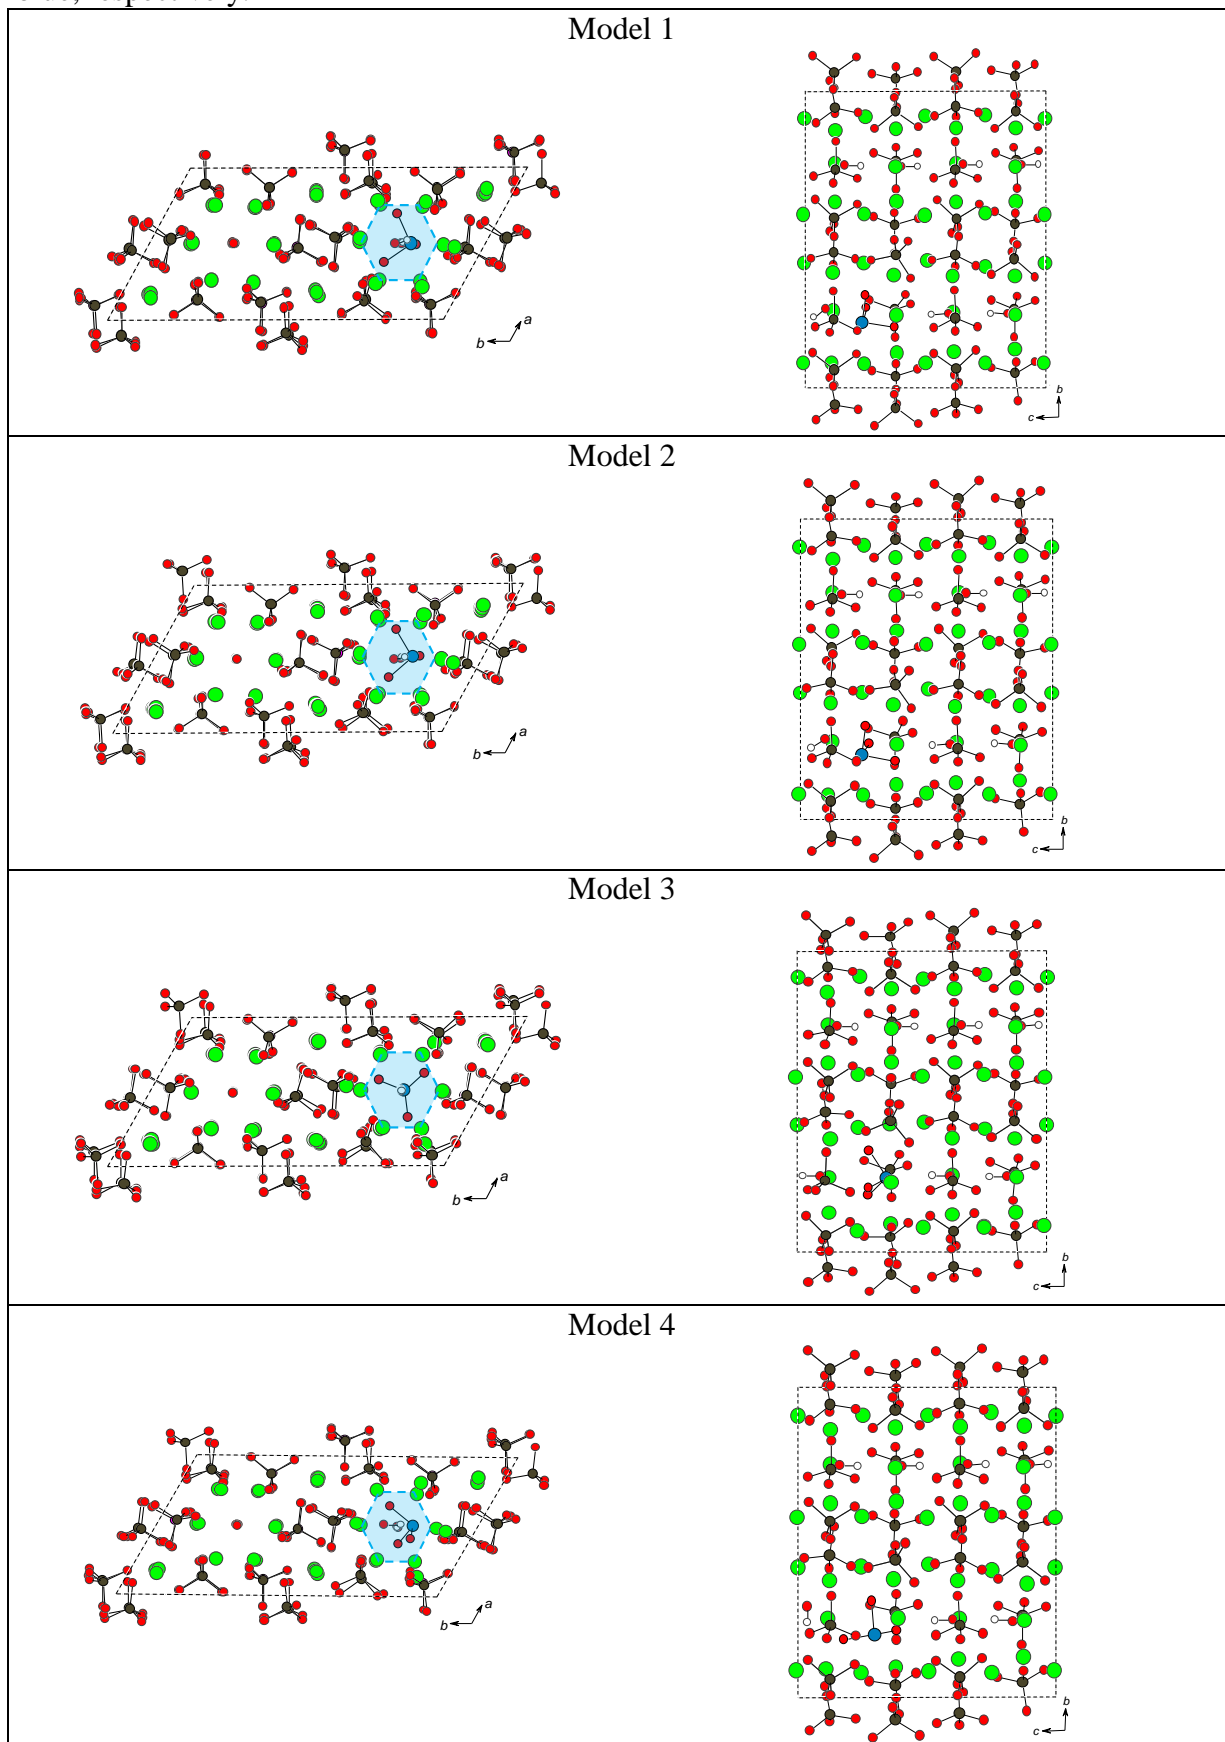

**Figure S7. Ca K-edge XANES data for non-substituted and iodate-substituted Ca-HA** (spectra recorded in transmission mode on the LUCIA beamline at Soleil).

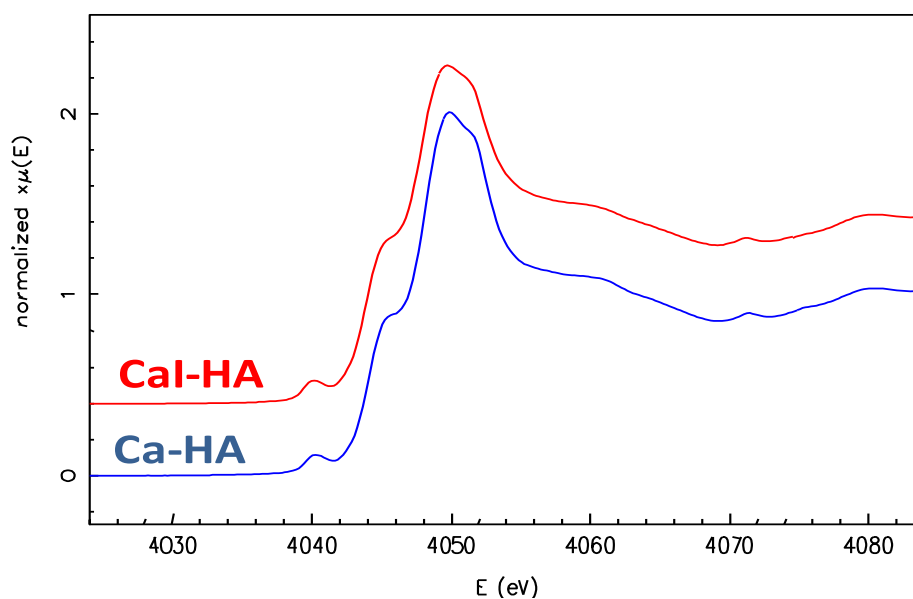

The Ca K-edge XANES spectra are essentially the same for both phases, with slightly more broadened features for the CaI-HA sample, due to the presence of iodates in the HA lattice (and thus of a larger distribution of Ca...O distances).



**Table S1. Relative energies of the 4 DFT models of iodate-substituted Ca-HA ( $\text{Ca}_{10}(\text{PO}_4)_6(\text{OH})_{1.75}(\text{IO}_3)_{0.25}$ ), after geometry optimisation.**

|         | Energy (eV)  | Relative energy (kcal.mol <sup>-1</sup> ) |
|---------|--------------|-------------------------------------------|
| Model 1 | -1253.834812 | 0                                         |
| Model 2 | -1252.706632 | 26.0                                      |
| Model 3 | -1251.517744 | 53.4                                      |
| Model 4 | -1251.965997 | 43.1                                      |

**Table S2.** Comparison of iodine local environments in the Sr(IO<sub>3</sub>)<sub>2</sub>·H<sub>2</sub>O, Ca(IO<sub>3</sub>)<sub>2</sub> and Ca(IO<sub>3</sub>)<sub>2</sub>·H<sub>2</sub>O crystal structures, before and after DFT relaxation of atomic positions.

| <b>Sr(IO<sub>3</sub>)<sub>2</sub>·H<sub>2</sub>O</b><br>(ICSD 68514) |       | Distances<br>(in Å) |             |
|----------------------------------------------------------------------|-------|---------------------|-------------|
| <b>Atomic pairs</b>                                                  |       | <b>Exp</b>          | <b>calc</b> |
| I1                                                                   | O3    | 1.788               | 1.809       |
|                                                                      | O1    | 1.804               | 1.830       |
|                                                                      | O2    | 1.820               | 1.853       |
|                                                                      | O2    | 2.840               | 2.778       |
|                                                                      | O1    | 2.847               | 2.822       |
|                                                                      | H1    | 3.074               | 3.032       |
|                                                                      | O3    | 3.174               | 3.147       |
|                                                                      | H1    | 3.234               | 3.166       |
|                                                                      | O2    | 3.235               | 3.254       |
|                                                                      | H1    | 3.440               | 3.461       |
|                                                                      | O4    | 3.636               | 3.609       |
|                                                                      | I1    | 3.712               | 3.663       |
| <b>Ca(IO<sub>3</sub>)<sub>2</sub></b><br>(ICSD 1391)                 |       | Distances<br>(in Å) |             |
| <b>Atomic pairs</b>                                                  |       | <b>Exp</b>          | <b>calc</b> |
| I1                                                                   | O2    | 1.796               | 1.849       |
|                                                                      | O3    | 1.801               | 1.846       |
|                                                                      | O1    | 1.825               | 1.873       |
|                                                                      | O4    | 2.811               | 2.779       |
|                                                                      | O1    | 2.920               | 2.862       |
|                                                                      | O5    | 3.159               | 3.083       |
|                                                                      | O2    | 3.246               | 3.205       |
|                                                                      | O6    | 3.441               | 3.473       |
|                                                                      | Ca1   | 3.720               | 3.728       |
|                                                                      | I2    | 3.800               | 3.807       |
| I2                                                                   | I1    | 3.864               | 3.825       |
|                                                                      | O5    | 1.795               | 1.839       |
|                                                                      | O6    | 1.804               | 1.844       |
|                                                                      | O4    | 1.814               | 1.867       |
|                                                                      | O1    | 2.862               | 2.807       |
|                                                                      | O4    | 2.902               | 2.852       |
|                                                                      | O3    | 3.051               | 3.008       |
|                                                                      | O3    | 3.164               | 3.154       |
|                                                                      | O2    | 3.333               | 3.239       |
|                                                                      | Ca1   | 3.569               | 3.601       |
| I1                                                                   | 3.800 | 3.807               |             |
| <b>Ca(IO<sub>3</sub>)<sub>2</sub>·H<sub>2</sub>O</b><br>(ICSD 36635) |       | Distances<br>(in Å) |             |
| <b>Atomic pairs</b>                                                  |       |                     |             |
| I1                                                                   | O2    | 1.788               | 1.805       |
|                                                                      | O1    | 1.817               | 1.838       |

|    |     |       |       |
|----|-----|-------|-------|
|    | O3  | 1.819 | 1.843 |
|    | O5  | 3.013 | 3.004 |
|    | O3  | 3.017 | 3.006 |
|    | H2  | 3.030 | 3.199 |
|    | O4  | 3.034 | 3.013 |
|    | O3  | 3.097 | 3.081 |
|    | O1  | 3.155 | 3.116 |
|    | H2  | 3.278 | 3.369 |
|    | Ca1 | 3.621 | 3.611 |
|    | Ca1 | 3.633 | 3.617 |
|    | H2  | 3.770 | 3.702 |
|    | O7  | 3.818 | 3.793 |
|    | O2  | 3.835 | 3.862 |
|    | I1  | 3.885 | 3.883 |
|    | I2  | 3.892 | 3.894 |
| I2 | O4  | 1.796 | 1.814 |
|    | O6  | 1.807 | 1.842 |
|    | O5  | 1.808 | 1.832 |
|    | O6  | 2.898 | 2.857 |
|    | O2  | 2.920 | 2.897 |
|    | O5  | 2.935 | 2.914 |
|    | H1  | 2.991 | 3.022 |
|    | O7  | 3.112 | 3.050 |
|    | O4  | 3.368 | 3.359 |
|    | H2  | 3.418 | 3.406 |
|    | H1  | 3.435 | 3.433 |
|    | Ca1 | 3.638 | 3.666 |
|    | H1  | 3.644 | 3.601 |
|    | H2  | 3.694 | 3.700 |
|    | H1  | 3.713 | 3.744 |
|    | I2  | 3.824 | 3.822 |
|    | I1  | 3.892 | 3.894 |
